# Supplementary material for: Synthesis, DNA Binding and Antitumor Evaluation of Styelsamine and Cystodytin Analogues
Source: MDPI journal article supplement (doi:10.3390/md11020274), 2013-01-28
Supplement: s2 [file s2]

marinedrugs-11-00274-s001.mol
  corina  05201403523D 1   1.00000     0.00000 
CORINA 3.49 0023  12.04.2013
 29 32  0  0  0  0  0  0  0  0999 V2000
    0.8564    1.0109    1.3730 C   0  0  0  0  0  0  0  0  0  0  0  0
    0.7853   -0.3666    1.1964 C   0  0  0  0  0  0  0  0  0  0  0  0
    1.9120   -1.1102    1.0162 C   0  0  0  0  0  0  0  0  0  0  0  0
    3.1756   -0.4881    1.0057 C   0  0  0  0  0  0  0  0  0  0  0  0
    3.2436    0.9188    1.1858 C   0  0  0  0  0  0  0  0  0  0  0  0
    2.0743    1.6539    1.3686 C   0  0  0  0  0  0  0  0  0  0  0  0
    4.2788   -1.2215    0.8290 N   0  0  0  0  0  0  0  0  0  0  0  0
    5.4928   -0.7109    0.8075 C   0  0  0  0  0  0  0  0  0  0  0  0
    5.6841    0.7295    0.9825 C   0  0  0  0  0  0  0  0  0  0  0  0
    4.5595    1.5600    1.1739 C   0  0  0  0  0  0  0  0  0  0  0  0
    6.9672    1.2998    0.9643 C   0  0  0  0  0  0  0  0  0  0  0  0
    7.1045    2.6062    1.1262 N   0  0  0  0  0  0  0  0  0  0  0  0
    6.0703    3.4054    1.3064 C   0  0  0  0  0  0  0  0  0  0  0  0
    4.7698    2.9285    1.3376 C   0  0  0  0  0  0  0  0  0  0  0  0
    6.6737   -1.5623    0.6102 C   0  0  0  0  0  0  0  0  0  0  0  0
    7.9113   -1.0279    0.5910 C   0  0  0  0  0  0  0  0  0  0  0  0
    8.1290    0.4080    0.7631 C   0  0  0  0  0  0  0  0  0  0  0  0
    5.6662   -3.3940    1.0392 H   0  0  0  0  0  0  0  0  0  0  0  0
    6.4999   -3.0481    0.4280 C   0  0  0  0  0  0  0  0  0  0  0  0
    6.0445   -4.7958   -1.2211 N   0  0  0  0  0  0  0  0  0  0  0  0
    6.2134   -3.3514   -1.0440 C   0  0  0  0  0  0  0  0  0  0  0  0
    5.7826   -5.2987   -2.4438 C   0  0  0  0  0  0  0  0  0  0  0  0
    5.6868   -4.5555   -3.3974 O   0  0  0  0  0  0  0  0  0  0  0  0
    5.6088   -6.7845   -2.6260 C   0  0  0  0  0  0  0  0  0  0  0  0
    9.2573    0.8651    0.7408 O   0  0  0  0  0  0  0  0  0  0  0  0
    3.4123   -8.4055   -3.3355 C   0  0  0  0  0  0  0  0  0  0  0  0
    4.2690   -7.7818   -4.4070 C   0  0  0  0  0  0  0  0  0  0  0  0
    5.3266   -7.0832   -4.0759 C   0  0  0  0  0  0  0  0  0  0  0  0
    3.9092   -7.9616   -5.8593 C   0  0  0  0  0  0  0  0  0  0  0  0
  1  2  2  0      
  2  3  1  0      
  3  4  2  0      
  4  5  1  0      
  5  6  2  0      
  6  1  1  0      
  4  7  1  0      
  7  8  2  0      
  8  9  1  0      
  9 10  1  0      
 10  5  1  0      
  9 11  2  0      
 11 12  1  0      
 12 13  2  0      
 13 14  1  0      
 14 10  2  0      
  8 15  1  0      
 15 16  2  0      
 16 17  1  0      
 17 11  1  0      
 18 19  1  0      
 19 15  1  0      
 20 21  1  0      
 21 19  1  0      
 20 22  1  0      
 22 23  2  0      
 22 24  1  0      
 17 25  2  0      
 26 27  1  0      
 27 28  2  0      
 28 24  1  0      
 27 29  1  0      
M  END
$$$$
