# Supplementary material for: Synthesis, DNA Binding and Antitumor Evaluation of Styelsamine and Cystodytin Analogues
Source: MDPI journal article supplement (doi:10.3390/md11020274), 2013-01-28
Supplement: s3 [file s3]

marinedrugs-11-00274-s001.mol
  ChemDraw04241410072D

 29 32  0  0  0  0  0  0  0  0999 V2000
   -3.5724    1.4437    0.0000 C   0  0  0  0  0  0  0  0  0  0  0  0
   -3.5724    0.6187    0.0000 C   0  0  0  0  0  0  0  0  0  0  0  0
   -2.8579    0.2062    0.0000 C   0  0  0  0  0  0  0  0  0  0  0  0
   -2.1434    0.6187    0.0000 C   0  0  0  0  0  0  0  0  0  0  0  0
   -2.1434    1.4437    0.0000 C   0  0  0  0  0  0  0  0  0  0  0  0
   -2.8579    1.8562    0.0000 C   0  0  0  0  0  0  0  0  0  0  0  0
   -1.4289    0.2062    0.0000 N   0  0  0  0  0  0  0  0  0  0  0  0
   -0.7145    0.6187    0.0000 C   0  0  0  0  0  0  0  0  0  0  0  0
   -0.7145    1.4437    0.0000 C   0  0  0  0  0  0  0  0  0  0  0  0
   -1.4289    1.8562    0.0000 C   0  0  0  0  0  0  0  0  0  0  0  0
   -0.0000    1.8562    0.0000 C   0  0  0  0  0  0  0  0  0  0  0  0
   -0.0000    2.6812    0.0000 N   0  0  0  0  0  0  0  0  0  0  0  0
   -0.7145    3.0937    0.0000 C   0  0  0  0  0  0  0  0  0  0  0  0
   -1.4289    2.6812    0.0000 C   0  0  0  0  0  0  0  0  0  0  0  0
   -0.0000    0.2062    0.0000 C   0  0  0  0  0  0  0  0  0  0  0  0
    0.7145    0.6187    0.0000 C   0  0  0  0  0  0  0  0  0  0  0  0
    0.7145    1.4437    0.0000 C   0  0  0  0  0  0  0  0  0  0  0  0
   -0.7145   -1.0312    0.0000 H   0  0  0  0  0  0  0  0  0  0  0  0
   -0.0000   -0.6188    0.0000 C   0  0  0  0  0  0  0  0  0  0  0  0
    0.7145   -1.8562    0.0000 N   0  0  0  0  0  0  0  0  0  0  0  0
    0.7145   -1.0312    0.0000 C   0  0  0  0  0  0  0  0  0  0  0  0
    1.4289   -2.2687    0.0000 C   0  0  0  0  0  0  0  0  0  0  0  0
    1.4289   -3.0937    0.0000 O   0  0  0  0  0  0  0  0  0  0  0  0
    2.1434   -1.8562    0.0000 C   0  0  0  0  0  0  0  0  0  0  0  0
    1.4289    1.8562    0.0000 O   0  0  0  0  0  0  0  0  0  0  0  0
    3.5724   -1.0312    0.0000 C   0  0  0  0  0  0  0  0  0  0  0  0
    2.8579   -0.6187    0.0000 C   0  0  0  0  0  0  0  0  0  0  0  0
    2.1434   -1.0312    0.0000 C   0  0  0  0  0  0  0  0  0  0  0  0
    2.8579    0.2063    0.0000 C   0  0  0  0  0  0  0  0  0  0  0  0
  1  2  2  0      
  2  3  1  0      
  3  4  2  0      
  4  5  1  0      
  5  6  2  0      
  6  1  1  0      
  4  7  1  0      
  7  8  2  0      
  8  9  1  0      
  9 10  1  0      
 10  5  1  0      
  9 11  2  0      
 11 12  1  0      
 12 13  2  0      
 13 14  1  0      
 14 10  2  0      
  8 15  1  0      
 15 16  2  0      
 16 17  1  0      
 17 11  1  0      
 18 19  1  0      
 19 15  1  0      
 20 21  1  0      
 21 19  1  0      
 20 22  1  0      
 22 23  2  0      
 22 24  1  0      
 17 25  2  0      
 26 27  1  0      
 27 28  2  0      
 28 24  1  0      
 27 29  1  0      
M  END
