# Supplementary material for: Synthesis, DNA Binding and Antitumor Evaluation of Styelsamine and Cystodytin Analogues
Source: MDPI journal article supplement (doi:10.3390/md11020274), 2013-01-28
Supplement: s4 [file s4]

marinedrugs-11-00274-s002.mol
  corina  05201403523D 1   1.00000     0.00000 
CORINA 3.49 0023  12.04.2013
 29 32  0  0  0  0  0  0  0  0999 V2000
   -0.0168    1.3864    0.0097 C   0  0  0  0  0  0  0  0  0  0  0  0
    0.0021   -0.0041    0.0020 C   0  0  0  0  0  0  0  0  0  0  0  0
    1.1785   -0.6900   -0.0125 C   0  0  0  0  0  0  0  0  0  0  0  0
    2.4029    0.0062   -0.0204 C   0  0  0  0  0  0  0  0  0  0  0  0
    2.3791    1.4260   -0.0131 C   0  0  0  0  0  0  0  0  0  0  0  0
    1.1605    2.1011    0.0023 C   0  0  0  0  0  0  0  0  0  0  0  0
    3.5552   -0.6707   -0.0341 N   0  0  0  0  0  0  0  0  0  0  0  0
    4.7372   -0.0895   -0.0422 C   0  0  0  0  0  0  0  0  0  0  0  0
    4.8347    1.3708   -0.0363 C   0  0  0  0  0  0  0  0  0  0  0  0
    3.6546    2.1442   -0.0215 C   0  0  0  0  0  0  0  0  0  0  0  0
    6.0818    2.0160   -0.0442 C   0  0  0  0  0  0  0  0  0  0  0  0
    6.1341    3.3384   -0.0380 N   0  0  0  0  0  0  0  0  0  0  0  0
    5.0466    4.0854   -0.0246 C   0  0  0  0  0  0  0  0  0  0  0  0
    3.7759    3.5332   -0.0166 C   0  0  0  0  0  0  0  0  0  0  0  0
    5.9748   -0.8808   -0.0567 C   0  0  0  0  0  0  0  0  0  0  0  0
    7.1788   -0.2743   -0.0640 C   0  0  0  0  0  0  0  0  0  0  0  0
    7.3031    1.1830   -0.0587 C   0  0  0  0  0  0  0  0  0  0  0  0
    5.0437   -2.7084    0.5325 H   0  0  0  0  0  0  0  0  0  0  0  0
    5.8978   -2.3859   -0.0629 C   0  0  0  0  0  0  0  0  0  0  0  0
    5.6587   -4.3452   -1.5069 N   0  0  0  0  0  0  0  0  0  0  0  0
    5.7336   -2.8822   -1.5009 C   0  0  0  0  0  0  0  0  0  0  0  0
    5.5125   -5.0077   -2.6715 C   0  0  0  0  0  0  0  0  0  0  0  0
    5.4429   -4.3926   -3.7145 O   0  0  0  0  0  0  0  0  0  0  0  0
    5.4355   -6.5127   -2.6778 C   0  0  0  0  0  0  0  0  0  0  0  0
    8.4028    1.7055   -0.0664 O   0  0  0  0  0  0  0  0  0  0  0  0
    5.2738   -7.0015   -4.0941 C   0  0  0  0  0  0  0  0  0  0  0  0
    6.3253   -7.3644   -4.7858 C   0  0  0  0  0  0  0  0  0  0  0  0
    6.1636   -7.8533   -6.2021 C   0  0  0  0  0  0  0  0  0  0  0  0
    3.9023   -7.0729   -4.7146 C   0  0  0  0  0  0  0  0  0  0  0  0
  1  2  2  0      
  2  3  1  0      
  3  4  2  0      
  4  5  1  0      
  5  6  2  0      
  6  1  1  0      
  4  7  1  0      
  7  8  2  0      
  8  9  1  0      
  9 10  1  0      
 10  5  1  0      
  9 11  2  0      
 11 12  1  0      
 12 13  2  0      
 13 14  1  0      
 14 10  2  0      
  8 15  1  0      
 15 16  2  0      
 16 17  1  0      
 17 11  1  0      
 18 19  1  0      
 19 15  1  0      
 20 21  1  0      
 21 19  1  0      
 20 22  1  0      
 22 23  2  0      
 22 24  1  0      
 17 25  2  0      
 24 26  1  0      
 26 27  2  0      
 27 28  1  0      
 29 26  1  0      
M  END
$$$$
