# Supplementary material for: Synthesis, DNA Binding and Antitumor Evaluation of Styelsamine and Cystodytin Analogues
Source: MDPI journal article supplement (doi:10.3390/md11020274), 2013-01-28
Supplement: s5 [file s5]

marinedrugs-11-00274-s002.mol
  ChemDraw04241410072D

 29 32  0  0  0  0  0  0  0  0999 V2000
   -3.8891    1.4437    0.0000 C   0  0  0  0  0  0  0  0  0  0  0  0
   -3.8891    0.6187    0.0000 C   0  0  0  0  0  0  0  0  0  0  0  0
   -3.1747    0.2062    0.0000 C   0  0  0  0  0  0  0  0  0  0  0  0
   -2.4602    0.6187    0.0000 C   0  0  0  0  0  0  0  0  0  0  0  0
   -2.4602    1.4437    0.0000 C   0  0  0  0  0  0  0  0  0  0  0  0
   -3.1747    1.8562    0.0000 C   0  0  0  0  0  0  0  0  0  0  0  0
   -1.7457    0.2062    0.0000 N   0  0  0  0  0  0  0  0  0  0  0  0
   -1.0313    0.6187    0.0000 C   0  0  0  0  0  0  0  0  0  0  0  0
   -1.0313    1.4437    0.0000 C   0  0  0  0  0  0  0  0  0  0  0  0
   -1.7457    1.8562    0.0000 C   0  0  0  0  0  0  0  0  0  0  0  0
   -0.3168    1.8562    0.0000 C   0  0  0  0  0  0  0  0  0  0  0  0
   -0.3168    2.6812    0.0000 N   0  0  0  0  0  0  0  0  0  0  0  0
   -1.0313    3.0937    0.0000 C   0  0  0  0  0  0  0  0  0  0  0  0
   -1.7457    2.6812    0.0000 C   0  0  0  0  0  0  0  0  0  0  0  0
   -0.3168    0.2062    0.0000 C   0  0  0  0  0  0  0  0  0  0  0  0
    0.3977    0.6187    0.0000 C   0  0  0  0  0  0  0  0  0  0  0  0
    0.3977    1.4437    0.0000 C   0  0  0  0  0  0  0  0  0  0  0  0
   -1.0313   -1.0312    0.0000 H   0  0  0  0  0  0  0  0  0  0  0  0
   -0.3168   -0.6188    0.0000 C   0  0  0  0  0  0  0  0  0  0  0  0
    0.3977   -1.8562    0.0000 N   0  0  0  0  0  0  0  0  0  0  0  0
    0.3977   -1.0312    0.0000 C   0  0  0  0  0  0  0  0  0  0  0  0
    1.1122   -2.2687    0.0000 C   0  0  0  0  0  0  0  0  0  0  0  0
    1.1122   -3.0937    0.0000 O   0  0  0  0  0  0  0  0  0  0  0  0
    1.8266   -1.8562    0.0000 C   0  0  0  0  0  0  0  0  0  0  0  0
    1.1122    1.8562    0.0000 O   0  0  0  0  0  0  0  0  0  0  0  0
    2.6516   -1.8562    0.0000 C   0  0  0  0  0  0  0  0  0  0  0  0
    3.0641   -2.5707    0.0000 C   0  0  0  0  0  0  0  0  0  0  0  0
    3.8891   -2.5707    0.0000 C   0  0  0  0  0  0  0  0  0  0  0  0
    3.0641   -1.1418    0.0000 C   0  0  0  0  0  0  0  0  0  0  0  0
  1  2  2  0      
  2  3  1  0      
  3  4  2  0      
  4  5  1  0      
  5  6  2  0      
  6  1  1  0      
  4  7  1  0      
  7  8  2  0      
  8  9  1  0      
  9 10  1  0      
 10  5  1  0      
  9 11  2  0      
 11 12  1  0      
 12 13  2  0      
 13 14  1  0      
 14 10  2  0      
  8 15  1  0      
 15 16  2  0      
 16 17  1  0      
 17 11  1  0      
 18 19  1  0      
 19 15  1  0      
 20 21  1  0      
 21 19  1  0      
 20 22  1  0      
 22 23  2  0      
 22 24  1  0      
 17 25  2  0      
 24 26  1  0      
 26 27  2  0      
 27 28  1  0      
 29 26  1  0      
M  END
