# Supplementary material for: Synthesis, DNA Binding and Antitumor Evaluation of Styelsamine and Cystodytin Analogues
Source: MDPI journal article supplement (doi:10.3390/md11020274), 2013-01-28
Supplement: s7 [file s7]

marinedrugs-11-00274-s003.mol
  ChemDraw04241410072D

 30 33  0  0  0  0  0  0  0  0999 V2000
   -3.8751    1.5807    0.0000 C   0  0  0  0  0  0  0  0  0  0  0  0
   -3.8751    0.7557    0.0000 C   0  0  0  0  0  0  0  0  0  0  0  0
   -3.1606    0.3432    0.0000 C   0  0  0  0  0  0  0  0  0  0  0  0
   -2.4461    0.7557    0.0000 C   0  0  0  0  0  0  0  0  0  0  0  0
   -2.4461    1.5807    0.0000 C   0  0  0  0  0  0  0  0  0  0  0  0
   -3.1606    1.9932    0.0000 C   0  0  0  0  0  0  0  0  0  0  0  0
   -1.7317    0.3432    0.0000 N   0  0  0  0  0  0  0  0  0  0  0  0
   -1.0172    0.7557    0.0000 C   0  0  0  0  0  0  0  0  0  0  0  0
   -1.0172    1.5807    0.0000 C   0  0  0  0  0  0  0  0  0  0  0  0
   -1.7317    1.9932    0.0000 C   0  0  0  0  0  0  0  0  0  0  0  0
   -0.3027    1.9932    0.0000 C   0  0  0  0  0  0  0  0  0  0  0  0
   -0.3027    2.8182    0.0000 N   0  0  0  0  0  0  0  0  0  0  0  0
   -1.0172    3.2307    0.0000 C   0  0  0  0  0  0  0  0  0  0  0  0
   -1.7317    2.8182    0.0000 C   0  0  0  0  0  0  0  0  0  0  0  0
   -0.3027    0.3432    0.0000 C   0  0  0  0  0  0  0  0  0  0  0  0
    0.4117    0.7557    0.0000 C   0  0  0  0  0  0  0  0  0  0  0  0
    0.4117    1.5807    0.0000 C   0  0  0  0  0  0  0  0  0  0  0  0
   -1.0172   -0.8943    0.0000 H   0  0  0  0  0  0  0  0  0  0  0  0
   -0.3027   -0.4818    0.0000 C   0  0  0  0  0  0  0  0  0  0  0  0
    0.4117   -1.7193    0.0000 N   0  0  0  0  0  0  0  0  0  0  0  0
    0.4117   -0.8943    0.0000 C   0  0  0  0  0  0  0  0  0  0  0  0
    1.1262   -2.1318    0.0000 C   0  0  0  0  0  0  0  0  0  0  0  0
    1.1262   -2.9568    0.0000 O   0  0  0  0  0  0  0  0  0  0  0  0
    1.8407   -1.7193    0.0000 C   0  0  0  0  0  0  0  0  0  0  0  0
    1.1262    1.9932    0.0000 O   0  0  0  0  0  0  0  0  0  0  0  0
    2.6657   -1.7193    0.0000 C   0  0  0  0  0  0  0  0  0  0  0  0
    3.0782   -2.4338    0.0000 C   0  0  0  0  0  0  0  0  0  0  0  0
    3.4907   -3.1483    0.0000 O   0  0  0  0  0  0  0  0  0  0  0  0
    2.8647   -3.2307    0.0000 C   0  0  0  0  0  0  0  0  0  0  0  0
    3.8751   -2.6473    0.0000 C   0  0  0  0  0  0  0  0  0  0  0  0
  1  2  2  0      
  2  3  1  0      
  3  4  2  0      
  4  5  1  0      
  5  6  2  0      
  6  1  1  0      
  4  7  1  0      
  7  8  2  0      
  8  9  1  0      
  9 10  1  0      
 10  5  1  0      
  9 11  2  0      
 11 12  1  0      
 12 13  2  0      
 13 14  1  0      
 14 10  2  0      
  8 15  1  0      
 15 16  2  0      
 16 17  1  0      
 17 11  1  0      
 18 19  1  0      
 19 15  1  0      
 20 21  1  0      
 21 19  1  0      
 20 22  1  0      
 22 23  2  0      
 22 24  1  0      
 17 25  2  0      
 24 26  1  0      
 26 27  1  0      
 27 28  1  0      
 27 29  1  0      
 27 30  1  0      
M  END
