# Supplementary material for: Synthesis, DNA Binding and Antitumor Evaluation of Styelsamine and Cystodytin Analogues
Source: MDPI journal article supplement (doi:10.3390/md11020274), 2013-01-28
Supplement: s8 [file s8]

marinedrugs-11-00274-s004.mol
  corina  05201403523D 1   1.00000     0.00000 
CORINA 3.49 0023  12.04.2013
 22 25  0  0  0  0  0  0  0  0999 V2000
   -0.0167    1.3809    0.0096 C   0  0  0  0  0  0  0  0  0  0  0  0
    0.0021   -0.0041    0.0020 C   0  0  0  0  0  0  0  0  0  0  0  0
    1.1999   -0.6895   -0.0126 C   0  0  0  0  0  0  0  0  0  0  0  0
    2.4016    0.0082   -0.0203 C   0  0  0  0  0  0  0  0  0  0  0  0
    2.3810    1.4130   -0.0130 C   0  0  0  0  0  0  0  0  0  0  0  0
    1.1660    2.0917    0.0022 C   0  0  0  0  0  0  0  0  0  0  0  0
    3.6073   -0.6788   -0.0345 N   0  0  0  0  0  0  0  0  0  0  0  0
    4.8266   -0.0116   -0.0419 C   0  0  0  0  0  0  0  0  0  0  0  0
    4.8648    1.3947   -0.0357 C   0  0  0  0  0  0  0  0  0  0  0  0
    3.6620    2.1409   -0.0213 C   0  0  0  0  0  0  0  0  0  0  0  0
    6.0982    2.0833   -0.0426 C   0  0  0  0  0  0  0  0  0  0  0  0
    6.1073    3.4215   -0.0360 N   0  0  0  0  0  0  0  0  0  0  0  0
    4.9976    4.1247   -0.0231 C   0  0  0  0  0  0  0  0  0  0  0  0
    3.7435    3.5229   -0.0156 C   0  0  0  0  0  0  0  0  0  0  0  0
    6.0164   -0.7136   -0.0550 C   0  0  0  0  0  0  0  0  0  0  0  0
    7.2335   -0.0404   -0.0619 C   0  0  0  0  0  0  0  0  0  0  0  0
    7.2914    1.3354   -0.0559 C   0  0  0  0  0  0  0  0  0  0  0  0
    7.2049   -2.7112   -0.6430 O   0  0  0  0  0  0  0  0  0  0  0  0
    5.9954   -2.2204   -0.0612 C   0  0  0  0  0  0  0  0  0  0  0  0
    5.8543   -4.2036    1.3686 N   0  0  0  0  0  0  0  0  0  0  0  0
    5.8748   -2.7348    1.3747 C   0  0  0  0  0  0  0  0  0  0  0  0
    8.4951    1.9690   -0.0639 O   0  0  0  0  0  0  0  0  0  0  0  0
  1  2  2  0      
  2  3  1  0      
  3  4  2  0      
  4  5  1  0      
  5  6  2  0      
  6  1  1  0      
  4  7  1  0      
  7  8  1  0      
  8  9  1  0      
  9 10  1  0      
 10  5  1  0      
  9 11  2  0      
 11 12  1  0      
 12 13  2  0      
 13 14  1  0      
 14 10  2  0      
  8 15  2  0      
 15 16  1  0      
 16 17  2  0      
 17 11  1  0      
 18 19  1  0      
 19 15  1  0      
 20 21  1  0      
 21 19  1  0      
 17 22  1  0      
M  END
$$$$
