# Supplementary material for: Synthesis, DNA Binding and Antitumor Evaluation of Styelsamine and Cystodytin Analogues
Source: MDPI journal article supplement (doi:10.3390/md11020274), 2013-01-28
Supplement: s9 [file s9]

marinedrugs-11-00274-s004.mol
  ChemDraw04241410072D

 22 25  0  0  0  0  0  0  0  0999 V2000
   -2.5006    0.8250    0.0000 C   0  0  0  0  0  0  0  0  0  0  0  0
   -2.5006   -0.0000    0.0000 C   0  0  0  0  0  0  0  0  0  0  0  0
   -1.7862   -0.4125    0.0000 C   0  0  0  0  0  0  0  0  0  0  0  0
   -1.0717   -0.0000    0.0000 C   0  0  0  0  0  0  0  0  0  0  0  0
   -1.0717    0.8250    0.0000 C   0  0  0  0  0  0  0  0  0  0  0  0
   -1.7862    1.2375    0.0000 C   0  0  0  0  0  0  0  0  0  0  0  0
   -0.3572   -0.4125    0.0000 N   0  0  0  0  0  0  0  0  0  0  0  0
    0.3572   -0.0000    0.0000 C   0  0  0  0  0  0  0  0  0  0  0  0
    0.3572    0.8250    0.0000 C   0  0  0  0  0  0  0  0  0  0  0  0
   -0.3572    1.2375    0.0000 C   0  0  0  0  0  0  0  0  0  0  0  0
    1.0717    1.2375    0.0000 C   0  0  0  0  0  0  0  0  0  0  0  0
    1.0717    2.0625    0.0000 N   0  0  0  0  0  0  0  0  0  0  0  0
    0.3572    2.4750    0.0000 C   0  0  0  0  0  0  0  0  0  0  0  0
   -0.3572    2.0625    0.0000 C   0  0  0  0  0  0  0  0  0  0  0  0
    1.0717   -0.4125    0.0000 C   0  0  0  0  0  0  0  0  0  0  0  0
    1.7862   -0.0000    0.0000 C   0  0  0  0  0  0  0  0  0  0  0  0
    1.7862    0.8250    0.0000 C   0  0  0  0  0  0  0  0  0  0  0  0
    0.3572   -1.6500    0.0000 O   0  0  0  0  0  0  0  0  0  0  0  0
    1.0717   -1.2375    0.0000 C   0  0  0  0  0  0  0  0  0  0  0  0
    1.7862   -2.4750    0.0000 N   0  0  0  0  0  0  0  0  0  0  0  0
    1.7862   -1.6500    0.0000 C   0  0  0  0  0  0  0  0  0  0  0  0
    2.5006    1.2375    0.0000 O   0  0  0  0  0  0  0  0  0  0  0  0
  1  2  2  0      
  2  3  1  0      
  3  4  2  0      
  4  5  1  0      
  5  6  2  0      
  6  1  1  0      
  4  7  1  0      
  7  8  1  0      
  8  9  1  0      
  9 10  1  0      
 10  5  1  0      
  9 11  2  0      
 11 12  1  0      
 12 13  2  0      
 13 14  1  0      
 14 10  2  0      
  8 15  2  0      
 15 16  1  0      
 16 17  2  0      
 17 11  1  0      
 18 19  1  0      
 19 15  1  0      
 20 21  1  0      
 21 19  1  0      
 17 22  1  0      
M  END
