# Supplementary material for: Synthesis, DNA Binding and Antitumor Evaluation of Styelsamine and Cystodytin Analogues
Source: MDPI journal article supplement (doi:10.3390/md11020274), 2013-01-28
Supplement: s10 [file s10]

marinedrugs-11-00274-s005.mol
  corina  05201403523D 1   1.00000     0.00000 
CORINA 3.49 0023  12.04.2013
 21 24  0  0  0  0  0  0  0  0999 V2000
   -0.0167    1.3816    0.0096 C   0  0  0  0  0  0  0  0  0  0  0  0
    0.0021   -0.0041    0.0020 C   0  0  0  0  0  0  0  0  0  0  0  0
    1.1988   -0.6899   -0.0130 C   0  0  0  0  0  0  0  0  0  0  0  0
    2.4014    0.0075   -0.0207 C   0  0  0  0  0  0  0  0  0  0  0  0
    2.3805    1.4133   -0.0130 C   0  0  0  0  0  0  0  0  0  0  0  0
    1.1651    2.0924    0.0022 C   0  0  0  0  0  0  0  0  0  0  0  0
    3.6059   -0.6773   -0.0354 N   0  0  0  0  0  0  0  0  0  0  0  0
    4.8136   -0.0204   -0.0432 C   0  0  0  0  0  0  0  0  0  0  0  0
    4.8613    1.3847   -0.0367 C   0  0  0  0  0  0  0  0  0  0  0  0
    3.6620    2.1371   -0.0214 C   0  0  0  0  0  0  0  0  0  0  0  0
    6.0986    2.0667   -0.0447 C   0  0  0  0  0  0  0  0  0  0  0  0
    6.1131    3.4019   -0.0382 N   0  0  0  0  0  0  0  0  0  0  0  0
    5.0065    4.1131   -0.0245 C   0  0  0  0  0  0  0  0  0  0  0  0
    3.7504    3.5205   -0.0163 C   0  0  0  0  0  0  0  0  0  0  0  0
    6.0215   -0.7354   -0.0574 C   0  0  0  0  0  0  0  0  0  0  0  0
    7.2511   -0.0424   -0.0649 C   0  0  0  0  0  0  0  0  0  0  0  0
    7.2965    1.3157   -0.0590 C   0  0  0  0  0  0  0  0  0  0  0  0
    7.0513   -2.7713   -0.0762 O   0  0  0  0  0  0  0  0  0  0  0  0
    6.0064   -2.1531   -0.0639 C   0  0  0  0  0  0  0  0  0  0  0  0
    5.0655   -2.6832   -0.0578 H   0  0  0  0  0  0  0  0  0  0  0  0
    8.4974    1.9544   -0.0673 O   0  0  0  0  0  0  0  0  0  0  0  0
  1  2  2  0      
  2  3  1  0      
  3  4  2  0      
  4  5  1  0      
  5  6  2  0      
  6  1  1  0      
  4  7  1  0      
  7  8  1  0      
  8  9  1  0      
  9 10  1  0      
 10  5  1  0      
  9 11  2  0      
 11 12  1  0      
 12 13  2  0      
 13 14  1  0      
 14 10  2  0      
  8 15  2  0      
 15 16  1  0      
 16 17  2  0      
 17 11  1  0      
 18 19  2  0      
 19 15  1  0      
 20 19  1  0      
 17 21  1  0      
M  END
$$$$
