# Supplementary material for: Synthesis, DNA Binding and Antitumor Evaluation of Styelsamine and Cystodytin Analogues
Source: MDPI journal article supplement (doi:10.3390/md11020274), 2013-01-28
Supplement: s12 [file s12]

marinedrugs-11-00274-s006.mol
  corina  05201403533D 1   1.00000     0.00000 
CORINA 3.49 0023  12.04.2013
 23 26  0  0  0  0  0  0  0  0999 V2000
   -0.0168    1.3818   -0.0902 C   0  0  0  0  0  0  0  0  0  0  0  0
    0.0020   -0.0036   -0.0973 C   0  0  0  0  0  0  0  0  0  0  0  0
    1.1990   -0.6895   -0.0921 C   0  0  0  0  0  0  0  0  0  0  0  0
    2.4014    0.0078   -0.0797 C   0  0  0  0  0  0  0  0  0  0  0  0
    2.3806    1.4134   -0.0731 C   0  0  0  0  0  0  0  0  0  0  0  0
    1.1652    2.0926   -0.0783 C   0  0  0  0  0  0  0  0  0  0  0  0
    3.6062   -0.6775   -0.0735 N   0  0  0  0  0  0  0  0  0  0  0  0
    4.8156   -0.0191   -0.0607 C   0  0  0  0  0  0  0  0  0  0  0  0
    4.8618    1.3863   -0.0541 C   0  0  0  0  0  0  0  0  0  0  0  0
    3.6620    2.1379   -0.0600 C   0  0  0  0  0  0  0  0  0  0  0  0
    6.0986    2.0690   -0.0405 C   0  0  0  0  0  0  0  0  0  0  0  0
    6.1123    3.4048   -0.0340 N   0  0  0  0  0  0  0  0  0  0  0  0
    5.0053    4.1148   -0.0398 C   0  0  0  0  0  0  0  0  0  0  0  0
    3.7494    3.5210   -0.0531 C   0  0  0  0  0  0  0  0  0  0  0  0
    6.0210   -0.7317   -0.0536 C   0  0  0  0  0  0  0  0  0  0  0  0
    7.2487   -0.0409   -0.0401 C   0  0  0  0  0  0  0  0  0  0  0  0
    7.2955    1.3185   -0.0336 C   0  0  0  0  0  0  0  0  0  0  0  0
    6.0053   -2.1997   -0.0598 C   0  0  0  0  0  0  0  0  0  0  0  0
    4.9506   -2.7969    0.0376 O   0  0  0  0  0  0  0  0  0  0  0  0
    7.1606   -2.8859   -0.1735 O   0  0  0  0  0  0  0  0  0  0  0  0
    7.0695   -4.3350   -0.1724 C   0  0  0  0  0  0  0  0  0  0  0  0
    8.4969    1.9565   -0.0210 O   0  0  0  0  0  0  0  0  0  0  0  0
    9.6670    1.1362   -0.0151 C   0  0  0  0  0  0  0  0  0  0  0  0
  1  2  2  0      
  2  3  1  0      
  3  4  2  0      
  4  5  1  0      
  5  6  2  0      
  6  1  1  0      
  4  7  1  0      
  7  8  1  0      
  8  9  1  0      
  9 10  1  0      
 10  5  1  0      
  9 11  2  0      
 11 12  1  0      
 12 13  2  0      
 13 14  1  0      
 14 10  2  0      
  8 15  2  0      
 15 16  1  0      
 16 17  2  0      
 17 11  1  0      
 15 18  1  0      
 18 19  2  0      
 18 20  1  0      
 20 21  1  0      
 17 22  1  0      
 22 23  1  0      
M  STY  1   1 SUP
M  SLB  1   1   1
M  SAL   1  4  18  19  20  21
M  SBL   1  1  21
M  SMT   1 CO2Me
M  SBV   1 21   -7.5886    3.6506
M  STY  1   2 SUP
M  SLB  1   2   2
M  SAL   2  2  22  23
M  SBL   2  1  25
M  SMT   2 OMe
M  SBV   2 25   -6.8744    4.8881
M  END
$$$$
