# Supplementary material for: Synthesis, DNA Binding and Antitumor Evaluation of Styelsamine and Cystodytin Analogues
Source: MDPI journal article supplement (doi:10.3390/md11020274), 2013-01-28
Supplement: s13 [file s13]

marinedrugs-11-00274-s006.mol
  ChemDraw04241410082D

 23 26  0  0  0  0  0  0  0  0999 V2000
   -2.8574    0.4125    0.0000 C   0  0  0  0  0  0  0  0  0  0  0  0
   -2.8574   -0.4125    0.0000 C   0  0  0  0  0  0  0  0  0  0  0  0
   -2.1429   -0.8250    0.0000 C   0  0  0  0  0  0  0  0  0  0  0  0
   -1.4285   -0.4125    0.0000 C   0  0  0  0  0  0  0  0  0  0  0  0
   -1.4285    0.4125    0.0000 C   0  0  0  0  0  0  0  0  0  0  0  0
   -2.1429    0.8250    0.0000 C   0  0  0  0  0  0  0  0  0  0  0  0
   -0.7140   -0.8250    0.0000 N   0  0  0  0  0  0  0  0  0  0  0  0
    0.0005   -0.4125    0.0000 C   0  0  0  0  0  0  0  0  0  0  0  0
    0.0005    0.4125    0.0000 C   0  0  0  0  0  0  0  0  0  0  0  0
   -0.7140    0.8250    0.0000 C   0  0  0  0  0  0  0  0  0  0  0  0
    0.7149    0.8250    0.0000 C   0  0  0  0  0  0  0  0  0  0  0  0
    0.7149    1.6500    0.0000 N   0  0  0  0  0  0  0  0  0  0  0  0
    0.0005    2.0625    0.0000 C   0  0  0  0  0  0  0  0  0  0  0  0
   -0.7140    1.6500    0.0000 C   0  0  0  0  0  0  0  0  0  0  0  0
    0.7149   -0.8250    0.0000 C   0  0  0  0  0  0  0  0  0  0  0  0
    1.4294   -0.4125    0.0000 C   0  0  0  0  0  0  0  0  0  0  0  0
    1.4294    0.4125    0.0000 C   0  0  0  0  0  0  0  0  0  0  0  0
    0.7143   -1.6500    0.0000 C   0  0  0  0  0  0  0  0  0  0  0  0
   -0.0002   -2.0625    0.0000 O   0  0  0  0  0  0  0  0  0  0  0  0
    1.4288   -2.0625    0.0000 O   0  0  0  0  0  0  0  0  0  0  0  0
    2.1433   -1.6500    0.0000 C   0  0  0  0  0  0  0  0  0  0  0  0
    2.1429    0.8250    0.0000 O   0  0  0  0  0  0  0  0  0  0  0  0
    2.8574    0.4125    0.0000 C   0  0  0  0  0  0  0  0  0  0  0  0
  1  2  2  0      
  2  3  1  0      
  3  4  2  0      
  4  5  1  0      
  5  6  2  0      
  6  1  1  0      
  4  7  1  0      
  7  8  1  0      
  8  9  1  0      
  9 10  1  0      
 10  5  1  0      
  9 11  2  0      
 11 12  1  0      
 12 13  2  0      
 13 14  1  0      
 14 10  2  0      
  8 15  2  0      
 15 16  1  0      
 16 17  2  0      
 17 11  1  0      
 15 18  1  0      
 18 19  2  0      
 18 20  1  0      
 20 21  1  0      
 17 22  1  0      
 22 23  1  0      
M  STY  1   1 SUP
M  SLB  1   1   1
M  SAL   1  4  18  19  20  21
M  SBL   1  1  21
M  SMT   1 CO2Me
M  SBV   1 21   -7.5886    3.6506
M  STY  1   2 SUP
M  SLB  1   2   2
M  SAL   2  2  22  23
M  SBL   2  1  25
M  SMT   2 OMe
M  SBV   2 25   -6.8744    4.8881
M  END
