# Supplementary material for: Synthesis, DNA Binding and Antitumor Evaluation of Styelsamine and Cystodytin Analogues
Source: MDPI journal article supplement (doi:10.3390/md11020274), 2013-01-28
Supplement: s14 [file s14]

marinedrugs-11-00274-s007.mol
  corina  05201403533D 1   1.00000     0.00000 
CORINA 3.49 0023  12.04.2013
 21 25  0  0  0  0  0  0  0  0999 V2000
   -0.0167    1.3812    0.0096 C   0  0  0  0  0  0  0  0  0  0  0  0
    0.0021   -0.0041    0.0020 C   0  0  0  0  0  0  0  0  0  0  0  0
    1.2012   -0.6860   -0.0132 C   0  0  0  0  0  0  0  0  0  0  0  0
    2.4018    0.0100   -0.0205 C   0  0  0  0  0  0  0  0  0  0  0  0
    2.3849    1.4202   -0.0120 C   0  0  0  0  0  0  0  0  0  0  0  0
    1.1637    2.0922    0.0022 C   0  0  0  0  0  0  0  0  0  0  0  0
    3.6103   -0.6888   -0.0374 N   0  0  0  0  0  0  0  0  0  0  0  0
    4.7632    0.0343   -0.0411 C   0  0  0  0  0  0  0  0  0  0  0  0
    4.8487    1.4148   -0.0310 C   0  0  0  0  0  0  0  0  0  0  0  0
    3.6530    2.1706   -0.0171 C   0  0  0  0  0  0  0  0  0  0  0  0
    6.1172    2.0350   -0.0351 C   0  0  0  0  0  0  0  0  0  0  0  0
    6.1599    3.3674   -0.0248 N   0  0  0  0  0  0  0  0  0  0  0  0
    5.0612    4.0949   -0.0118 C   0  0  0  0  0  0  0  0  0  0  0  0
    3.7812    3.5471   -0.0082 C   0  0  0  0  0  0  0  0  0  0  0  0
    5.8822   -0.7852   -0.0562 C   0  0  0  0  0  0  0  0  0  0  0  0
    7.1447   -0.1640   -0.0600 C   0  0  0  0  0  0  0  0  0  0  0  0
    7.2579    1.1993   -0.0494 C   0  0  0  0  0  0  0  0  0  0  0  0
    3.9700   -2.0103   -0.0516 C   0  0  0  0  0  0  0  0  0  0  0  0
    5.3203   -2.1320   -0.0631 C   0  0  0  0  0  0  0  0  0  0  0  0
    8.4952    1.7636   -0.0540 O   0  0  0  0  0  0  0  0  0  0  0  0
    9.6137    0.8743   -0.0700 C   0  0  0  0  0  0  0  0  0  0  0  0
  1  2  2  0      
  2  3  1  0      
  3  4  2  0      
  4  5  1  0      
  5  6  2  0      
  6  1  1  0      
  4  7  1  0      
  7  8  1  0      
  8  9  1  0      
  9 10  1  0      
 10  5  1  0      
  9 11  2  0      
 11 12  1  0      
 12 13  2  0      
 13 14  1  0      
 14 10  2  0      
  8 15  2  0      
 15 16  1  0      
 16 17  2  0      
 17 11  1  0      
  7 18  1  0      
 15 19  1  0      
 18 19  2  0      
 17 20  1  0      
 20 21  1  0      
M  STY  1   1 SUP
M  SLB  1   1   1
M  SAL   1  2  20  21
M  SBL   1  1  24
M  SMT   1 OMe
M  SBV   1 24   -6.6682    5.3522
M  END
$$$$
