# Supplementary material for: Synthesis, DNA Binding and Antitumor Evaluation of Styelsamine and Cystodytin Analogues
Source: MDPI journal article supplement (doi:10.3390/md11020274), 2013-01-28
Supplement: s15 [file s15]

marinedrugs-11-00274-s007.mol
  ChemDraw04241410082D

 21 25  0  0  0  0  0  0  0  0999 V2000
   -2.8574    0.1547    0.0000 C   0  0  0  0  0  0  0  0  0  0  0  0
   -2.8574   -0.6703    0.0000 C   0  0  0  0  0  0  0  0  0  0  0  0
   -2.1429   -1.0828    0.0000 C   0  0  0  0  0  0  0  0  0  0  0  0
   -1.4285   -0.6703    0.0000 C   0  0  0  0  0  0  0  0  0  0  0  0
   -1.4285    0.1547    0.0000 C   0  0  0  0  0  0  0  0  0  0  0  0
   -2.1429    0.5672    0.0000 C   0  0  0  0  0  0  0  0  0  0  0  0
   -0.7140   -1.0828    0.0000 N   0  0  0  0  0  0  0  0  0  0  0  0
    0.0005   -0.6703    0.0000 C   0  0  0  0  0  0  0  0  0  0  0  0
    0.0005    0.1547    0.0000 C   0  0  0  0  0  0  0  0  0  0  0  0
   -0.7140    0.5672    0.0000 C   0  0  0  0  0  0  0  0  0  0  0  0
    0.7149    0.5672    0.0000 C   0  0  0  0  0  0  0  0  0  0  0  0
    0.7149    1.3922    0.0000 N   0  0  0  0  0  0  0  0  0  0  0  0
    0.0005    1.8047    0.0000 C   0  0  0  0  0  0  0  0  0  0  0  0
   -0.7140    1.3922    0.0000 C   0  0  0  0  0  0  0  0  0  0  0  0
    0.7149   -1.0828    0.0000 C   0  0  0  0  0  0  0  0  0  0  0  0
    1.4294   -0.6703    0.0000 C   0  0  0  0  0  0  0  0  0  0  0  0
    1.4294    0.1547    0.0000 C   0  0  0  0  0  0  0  0  0  0  0  0
   -0.4517   -1.8047    0.0000 C   0  0  0  0  0  0  0  0  0  0  0  0
    0.4558   -1.8047    0.0000 C   0  0  0  0  0  0  0  0  0  0  0  0
    2.1429    0.5672    0.0000 O   0  0  0  0  0  0  0  0  0  0  0  0
    2.8574    0.1547    0.0000 C   0  0  0  0  0  0  0  0  0  0  0  0
  1  2  2  0      
  2  3  1  0      
  3  4  2  0      
  4  5  1  0      
  5  6  2  0      
  6  1  1  0      
  4  7  1  0      
  7  8  1  0      
  8  9  1  0      
  9 10  1  0      
 10  5  1  0      
  9 11  2  0      
 11 12  1  0      
 12 13  2  0      
 13 14  1  0      
 14 10  2  0      
  8 15  2  0      
 15 16  1  0      
 16 17  2  0      
 17 11  1  0      
  7 18  1  0      
 15 19  1  0      
 18 19  2  0      
 17 20  1  0      
 20 21  1  0      
M  STY  1   1 SUP
M  SLB  1   1   1
M  SAL   1  2  20  21
M  SBL   1  1  24
M  SMT   1 OMe
M  SBV   1 24   -6.6682    5.3522
M  END
